# Supplementary material for: Intramolecular halogen–halogen bonds?
Source: Royal Society of Chemistry journal article supplement (doi:10.1039/c3cp50962a), 2013-01-01
Supplement: c3cp50962a.pdf [file c3cp50962a.pdf]

## Supporting Information for “Intramolecular Halogen–Halogen Bonds?”

Mikael P. Johansson<sup>1,2\*</sup> and Marcel Swart<sup>1,3\*</sup>

<sup>1</sup> Institut de Química Computacional i Catàlisi and Departament de Química, Universitat de Girona,  
Campus Montilivi, ES-17071 Girona, Spain

<sup>2</sup> Laboratory for Instruction in Swedish, Department of Chemistry, University of Helsinki, FI-00014  
Helsinki, Finland

<sup>3</sup> Institució Catalana de Recerca i Estudis Avançats (ICREA), Barcelona, Spain

\* *mikael.johansson@iki.fi, marcel.swart@icrea.cat*

12 Apr 2013

### Cartesian coordinates (in Ångströms) for the ethanes

#### C<sub>2</sub>H<sub>6</sub>

|   |          |          |          |
|---|----------|----------|----------|
| C | 0.00000  | 0.00000  | -0.76700 |
| H | 0.00000  | 1.03833  | -1.16558 |
| H | 0.89922  | -0.51916 | -1.16558 |
| H | -0.89922 | -0.51916 | -1.16558 |
| C | 0.00000  | 0.00000  | 0.76700  |
| H | 0.00000  | -1.03833 | 1.16558  |
| H | 0.89922  | 0.51916  | 1.16558  |
| H | -0.89922 | 0.51916  | 1.16558  |

#### C<sub>2</sub>F<sub>6</sub>

|   |          |          |          |
|---|----------|----------|----------|
| C | 0.00000  | 0.00000  | -0.77250 |
| F | 0.00000  | 1.24839  | -1.21949 |
| F | 1.08114  | -0.62420 | -1.21949 |
| F | -1.08114 | -0.62420 | -1.21949 |
| C | 0.00000  | 0.00000  | 0.77250  |
| F | 0.00000  | -1.24839 | 1.21949  |
| F | 1.08114  | 0.62420  | 1.21949  |
| F | -1.08114 | 0.62420  | 1.21949  |

### CF<sub>3</sub>CCl<sub>3</sub>

|    |          |          |          |
|----|----------|----------|----------|
| C  | 0.00000  | 0.00000  | 1.15944  |
| F  | 0.00000  | -1.24760 | 1.62212  |
| F  | 1.08045  | 0.62380  | 1.62212  |
| F  | -1.08045 | 0.62380  | 1.62212  |
| C  | 0.00000  | 0.00000  | -0.39188 |
| Cl | 0.00000  | 1.67080  | -0.94907 |
| Cl | 1.44696  | -0.83540 | -0.94907 |
| Cl | -1.44696 | -0.83540 | -0.94907 |

### C<sub>2</sub>Cl<sub>6</sub>

|    |          |          |          |
|----|----------|----------|----------|
| C  | 0.00000  | 0.00000  | -0.78200 |
| Cl | 0.00000  | 1.66232  | -1.38703 |
| Cl | 1.43961  | -0.83116 | -1.38703 |
| Cl | -1.43961 | -0.83116 | -1.38703 |
| C  | 0.00000  | 0.00000  | 0.78200  |
| Cl | 0.00000  | -1.66232 | 1.38703  |
| Cl | 1.43961  | 0.83116  | 1.38703  |
| Cl | -1.43961 | 0.83116  | 1.38703  |

### C<sub>2</sub>Cl<sub>6</sub> transition state

|    |          |          |          |
|----|----------|----------|----------|
| C  | 0.00000  | 0.00000  | -0.82976 |
| Cl | 0.82237  | 1.42439  | -1.47796 |
| Cl | 0.82237  | -1.42439 | -1.47796 |
| Cl | -1.64474 | 0.00000  | -1.47796 |
| C  | 0.00000  | 0.00000  | 0.82976  |
| Cl | 0.82237  | -1.42439 | 1.47796  |
| Cl | 0.82237  | 1.42439  | 1.47796  |
| Cl | -1.64474 | 0.00000  | 1.47796  |

### CH<sub>3</sub>CCl<sub>3</sub>

|    |          |          |          |
|----|----------|----------|----------|
| C  | 0.00000  | 0.00000  | -0.85011 |
| H  | -0.51355 | -0.88949 | -1.20597 |
| H  | -0.51355 | 0.88949  | -1.20597 |
| H  | 1.02709  | 0.00000  | -1.20597 |
| C  | 0.00000  | 0.00000  | 0.66198  |
| Cl | 0.83436  | 1.44516  | 1.26869  |
| Cl | -1.66872 | 0.00000  | 1.26869  |
| Cl | 0.83436  | -1.44516 | 1.26869  |

### Rotating view of the NCI regions in C<sub>2</sub>Cl<sub>6</sub>

Available as a separate file: C2Cl6-NCI .mpg
